# Supplementary material for: Root and leaf metabolite profiles analysis reveals the adaptive strategies to low potassium stress in barley
Source: BMC Plant Biol. 2018 Sep 10;18:187. doi: 10.1186/s12870-018-1404-4 (PMC6131769; doi:10.1186/s12870-018-1404-4)
Supplement: Supplementary file 1 — Table S1. Concentrations of each metabolite in roots and leaves of the three barley genotypes under control and LK condition (XLSX 56 kb) [file 12870_2018_1404_MOESM1_ESM.xlsx]

## Sheet: Table S1
Table S1. Concentration of each metabolites in roots and leaves of the three barley genotypes under control and LK condition
Number	Metabolite Name	XZ153_C_L						XZ141_C_L						LuDaoMai_C_L						XZ153_C_R						XZ141_C_R						LuDaoMai_C_R						XZ153_LK_L						XZ141_LK_L
		1	2	3	4	5	6	1	2	3	4	5	6	1	2	3	4	5	6	1	2	3	4	5	6	1	2	3	4	5	6	1	2	3	4	5	6	1	2	3	4	5	6	1	2	3	4	5	6
1	Hexanoic acid	653.723	685.118	990.017	669.94	812.873	696.697	718.624	979.552	753.011	894.945	1089.29	961.671	1054.06	1264.45	1168.83	961.161	1251.9	832.587	857.473	1220.01	1248.72	909.725	1106.26	1151.56	1044.16	1079.21	811.292	1040.55	990.811	985.674	987.693	1383.87	985.988	1403.61	1109.51	786.375	1119.04	1147.03	905.059	967.02	634.209	637.285	1094.94	1614.05	1202.53	1209.9	1124.8	1249.24
2	Glycolic acid	1165.23	868.517	906.14	759.3	783.868	648.383	939.875	752.362	861.918	902.645	827.83	856.926	1357.07	936.143	1146.92	1227.15	1010.18	1269.44	344.873	529.282	336.879	541.262	481.495	425.643	383.984	525.14	405.868	396.375	578.858	297.148	599.77	731.73	590.988	807.819	757.068	527.469	4644.43	4031.44	2741.97	2433.94	2536	2452.54	1918.41	2475.1	1876.64	2659.05	2018.53	1643.77
3	L-Alanine	36459.2	49132.1	50027.7	50368.7	46812.8	40850.7	35188.9	30670.4	34343.4	39097.9	36643.9	34863.7	72324.4	80848.2	74144.7	79902.4	68821.1	72466.5	12873.3	13067.3	12410.7	12316.6	13624.2	12126.7	11756.7	11509.5	11560.2	10211.6	12550	11797.1	9893.05	11193.3	9457.77	10890.8	9895.34	10797.4	44600.7	52927	43978.9	41944.6	45463.2	47596.6	50344.3	52176.5	53414.4	49019.1	48328.5	46304.3
4	Valine	8186.99	11774.9	11468.4	11102.7	11217.8	10762.3	11060.7	11098.9	12319.4	12379.4	12616.1	11620.4	16953	18339.5	15849.2	17976.7	15554.9	14881.9	7257.79	5668.23	6148.62	6386.3	4482.15	6402.87	7264.64	6729.11	4619.79	5157.99	5082	5318.77	5967.44	8241.07	7284.79	15815.6	13793	4505.18	22139.1	26884.3	22741.3	22740.8	27230.2	23594.6	29578.5	30239.4	31858.6	31393.8	31469.3	31612.2
5	Urea	-	-	-	-	-	-	-	-	-	-	-	-	-	-	-	-	-	-	3220.77	1516.37	1747.44	2194.6	934.019	2516.55	2476.79	2013.86	1416.81	1104.84	1023.27	731.209	5085.34	5959.05	5720.08	3947.4	3481.84	3660.87	-	-	-	-	-	-	-	-	-	-	-	-
6	Benzoic acid	187.428	188.418	189.536	168.112	171.202	169.102	327.015	396.152	392.483	315.569	346.613	370.053	385.479	259.065	305.555	267.37	461.328	198.474	396.763	559.631	570.238	524.38	529.862	565.406	472.829	677.33	475.058	694.274	868.096	876.391	767.784	1036.18	882.51	1031.09	943.373	1069.48	1103.86	911.948	971.973	762.92	759.16	961.826	1285.2	1178.28	1106.48	1158.97	946.946	770.977
7	L-Leucine	736.771	885.959	735.717	686.652	745.72	629.806	829.359	706.762	943.011	1076.24	870.328	550.452	1888.91	1995.09	1480	2037.3	1525.47	1527.33	2962.15	2253.69	2124.75	2306.82	2278	2732.2	3342.9	2461.93	1587.14	2555.5	2038	1497.79	2219.37	2890.28	2872.23	3195.04	3893.09	2102.21	1583	2174.03	1531.58	1458.18	2177.39	1447.22	2493.5	2878.57	3486.6	2875.05	3716.49	2368.14
8	Glycerol	-	-	-	-	-	-	-	-	-	-	-	-	-	-	-	-	-	-	3737.04	5056.92	5975.87	4069.71	5050.33	4540.76	4426.5	5071.88	5058.43	5203.23	6132.56	5395.24	4281.94	5826.01	4132.23	5369.26	5303.02	4665.81	-	-	-	-	-	-	-	-	-	-	-	-
9	L-Isoleucine	3744.32	3591.1	3437.66	4504	3662.93	3525.91	4178.28	5031.8	3986.09	4473.72	5485.45	5722.14	2567.54	2595.44	2402.05	2659.82	2914.43	3025.07	3133.4	2916.99	3909.47	3752.95	2956.14	2876.6	5935.08	7186.45	3562.86	4038.08	8065.07	5009.02	3655.91	3910.77	3570.62	3448.98	3976.89	3465.53	8914.33	6380.95	7829.55	7488.67	7103.58	7435.05	9753.72	12480.2	8728.68	13539.2	10938.6	9599.33
10	L-Proline	663.929	931.839	792.953	690.88	812.384	739.392	1015.57	1190.82	1323.38	1334.09	1130.7	971.628	2518	3262.6	2767.55	3253.61	2127.76	2638.4	1574.95	1416.76	1326.83	1410.63	1440.3	1413.88	1788.56	1235.84	715.04	1240.31	709.205	1026.27	1120.56	1403.91	1141.78	1232.14	1411.38	1241.45	1301.81	1431.95	1167.7	1286.96	1399.53	1379.04	1909.52	1653.08	1831.39	1555.18	1844.7	1808.23
11	Maleic acid	1668.31	1797.91	1755.96	1713.59	1922.77	1833.7	3691.08	3963.83	3965.36	3845.65	3757.96	4073.27	5296.46	5375.31	5504.94	4974.79	3858.55	3951.93	673.13	597.051	734.264	703.734	818.006	376.607	755.523	640.454	532.078	496.075	757.591	792.694	964.948	667.162	460.171	543.836	516.242	527.145	13105.2	18869.4	15364.6	20721.8	22830.1	24296.7	25931.2	24538.3	29584.2	27490	29021.6	24403.4
12	Glycine	10240.8	11895.2	12533.4	12116.8	11975.9	11202.2	10923	11906.2	13754.4	12867.7	11757	14279.5	13423.9	12923.3	13517.9	14181.7	15258.8	14403.9	3070.34	3306.37	3475.51	3089.43	2893.08	2700.95	3263.95	4098.32	2864.75	2972.8	4656.93	3610.6	2956.54	3221.73	2671.12	3257.47	2844.84	2697.8	56238.4	52391.2	54269.4	62347.7	54135.9	64352.5	136917	133111	133980	140790	129595	125742
13	Succinic acid	21942.9	19370.4	20869.6	25531.7	23852.1	18983.4	22462.4	22531	25141.8	24870.8	23698.4	27172.3	24492.3	23164.2	23889.4	22538.3	25273.5	27815.3	18146.7	16594.2	18413.2	20431.8	20459.3	19404.2	12951.8	15146.8	11405.8	14927.4	17206.8	16898.7	8888.2	9352.76	7383.07	7815.13	8496.34	9089.74	8592.75	8781.16	7886.42	6884.5	8543.57	8856.77	9507.27	10361.7	9343.74	10170.3	10743.3	10858.8
14	Glyceric acid	22331.1	17340.2	19208.1	20252.3	16892.8	16894.1	17877.5	16313.7	16203.3	18258.2	18595.8	21868.9	13642.7	13174.8	13172.2	12187.7	13405.1	11545.2	305.768	387.924	260.376	269.004	289.929	361.6	270.369	273.146	193.187	188.743	426.399	196.075	295.537	308.622	307.125	309.715	308.843	259.772	16671.1	15698.7	17449.3	16051.6	16839.4	15299.2	16652.2	17630.7	17387.5	20059.7	17495.2	17249.8
15	Uracil	236.288	236.652	240.738	248.292	246.374	277.486	418.258	433.204	631.109	669.086	453.204	611.109	602.571	314.477	267.026	602.571	314.477	267.026	118.144	118.326	120.369	124.146	123.187	138.743	209.129	216.602	315.555	334.543	226.602	305.555	246.928	285.178	292.234	318.318	289.912	283.178	2387.33	2055.65	2119.03	1988.91	2105.5	1918.19	1177.94	1104.73	1560.33	1491.72	1299.22	1556.68
16	Fumaric acid	19291.7	16824.2	17252.5	19868.9	18029.7	17079.9	10842.7	11196.9	11784	11282.7	11349.3	11066.1	7566.71	8100.56	7304.82	7229.06	7910.31	6797.54	2191.31	2090.69	2322.37	2201.78	1762.3	2044.73	1722.42	1863.49	1592.63	1569.14	1794.74	1646.57	1302.05	1225.3	1094.51	1143.95	1445.6	1208.45	13520.5	13982.1	12895.7	12707.6	15873.6	15842.1	8042.28	7118.26	6976.81	7726.65	8489.89	9453.16
17	L-Serine	30084.5	41650.5	44744.8	40507.3	45080.5	31231.7	107017	104477	114464	113088	114461	114168	81943.9	87947.7	83241.5	84810.9	80152.2	81113	27788.1	25237.4	26856.5	26644.4	24958.6	22832.2	42688.8	40192.7	27071.8	37608.5	28300.9	39060.5	28858.6	31759.1	27837.9	33235.4	33530.3	28405.2	74801.3	83825.1	79409.3	72842.5	80154.3	75454.5	191629	194079	204245	184560	201416	212735
18	Pipecolinic acid	578.094	778.503	693.472	464.927	549.314	560.124	1357.74	1343.86	1459.38	1771.54	1635.54	1552.58	12584.2	14571.7	12064.8	14933.6	10219.8	12616.1	684.672	607.575	522.676	667.837	418.897	830.803	1049.26	770.079	401.536	805.247	321.167	731.455	753.164	1718.5	1328.66	2304.59	2687.04	757.356	5466.69	13477.6	7037.03	7446.08	11186.6	6935.94	8400.2	5957.53	14285.1	5185.23	8561.64	13149.8
19	Threonic acid-1,4-lactones	1699.73	1779	1822.23	2110.07	1954.42	1746.44	2264.97	2185.17	2225.42	1969.96	2205.89	2912.11	2319.05	2185.01	2168.19	2184.34	2033.92	2601.98	-	-	-	-	-	-	-	-	-	-	-	-	-	-	-	-	-	-	1914.64	1986.48	1951.54	1732.74	2099.67	2198.88	2808.5	3413.66	2795.23	3067.16	4392.23	4812.51
20	L-Threonine	18928.9	22462.6	20620.7	22617.5	18058.3	21800.9	27105	34119.1	27390.4	33793	27999.3	40717.6	36736.5	32488.3	36077	33030.5	30954.7	35080.6	8844.71	9304.65	8664.82	8057.75	8975.15	9802.75	15085.9	15731.1	11197.2	13152	12626.8	11101.7	9108.46	11494.1	11017.9	16798.8	12274.4	10857.9	32541.4	38635.2	34293.3	37141.9	37048.9	36134.9	54137.7	55373.5	58140.6	54961.4	56414.4	56486
21	O-Acetyl-L-Serine	628.92	439.565	761.986	394.244	758.868	624.464	1379.44	1775.15	1627.15	1576.7	1760.85	1143.08	1423.67	2227.9	1914.72	1369.78	1367.11	1469.15	-	-	-	-	-	-	-	-	-	-	-	-	-	-	-	-	-	-	1294.17	1771.84	1381.67	1456.32	1497.33	1518.18	2234.35	1929.82	2143.54	1915.49	2249.09	3116.83
22	β-Alanine	1819.99	1688.48	1799.4	2020.12	1926.23	1593.51	2126.43	2045.39	2421.51	2085.75	2129.89	2402.93	2318.01	2365.51	2528.33	2423.81	2117.68	2951.8	2323.98	2251.29	2436.32	2273.06	2226.32	2279.81	2334.63	2784.97	2166.13	2669.53	2915.02	2906.24	1485.8	1657.35	1446.1	1778.07	1584.14	1448.65	874.757	973.686	947.479	984.848	863.797	947.512	1586.72	1527.04	1442.16	1551.54	1533.13	1579.73
23	L-Glutamine	5135.07	5998.38	5567.22	5056.19	5391	5402.09	7954.59	6834.94	7215.61	6253	6352.7	7242.05	11012.2	14018.8	11368.3	13270.3	11771	12150.1	3413.26	2490.08	4549.19	4254.75	3047.02	3609.32	11544.3	12283.9	7194.3	9296.45	8460.75	7425.85	15302.7	14698.5	14196.3	16652.5	16331.8	15256.4	74335.2	72285	72386.4	74125.1	77115.7	77480.1	53021.8	47848.2	44058.6	40588.7	38759.2	39369.2
24	Malic acid	558247	681764	625315	617002	654376	564708	794216	839456	847188	731812	875722	795487	848944	898039	638124	590429	744913	758048	112952	137369	142082	119435	126754	143903	82594.7	82968.8	77820.7	94845.2	92904.9	94177.8	69458.8	72447.9	64054.1	52837.1	63146.7	65487.2	126051	142431	148297	129552	155230	151495	135754	169059	154842	159022	159995	147749
25	L-Aspartic acid	111175	165896	125883	176043	123274	118466	224621	274785	276850	201493	287830	308881	352540	368131	378413	360883	364128	360831	157992	126047	97443.8	111187	131194	110653	167714	122268	160344	130811	174867	136878	70653.6	96917.3	78008.7	82642.2	89425.1	78409.9	32186	38993.4	36468.1	63277	62402.7	35744.7	53709.6	38105.7	40895.9	38156.1	63169.5	63358.2
26	Pyroglutamic acid	101249	79271.1	96492.9	103334	106043	89525.5	106970	115515	151057	134580	133427	116943	178291	178669	178476	176036	185838	177415	64256.7	77881.7	73295.8	99680.4	82659.9	100293	122944	139410	125029	117983	141105	132830	119353	111205	92271.3	106080	98135.3	118979	134673	156227	149166	154988	159354	170179	104931	94444	108406	100008	106052	94865.9
27	GABA	18172.6	17031.7	17475.3	17299.5	17538.3	16917.9	22918.8	22495.6	24778.4	23192	23938.9	22304.5	18938.9	21963.2	20179.9	18169.5	18889.9	20427.9	23379.4	28681.8	27428.1	23961.9	29897.4	25815.6	33833	40014	31573.4	33752	46298	42576.9	20386.2	20426.8	16227.5	16400.8	17828.2	18118.3	19637.3	17367.8	19852.8	19555.6	17700.6	20424.2	30825	32575.1	30294.5	26361.4	28600.8	26271.1
28	Threonic acid	15009.4	14682.1	17597	18935.9	20220.5	16111.8	15714	16482	18356.7	16821.9	19893.9	20740.9	29544.3	26885.9	26451.2	24389.5	26018.9	31893	867.52	667.09	873.137	974.472	631.029	842.117	182.978	546.393	537.185	130.681	581.978	98.9184	76.9736	40.3333	62.1331	81.0832	110.778	94.6497	6052.81	6132.44	5304.41	5941.64	6530.76	7119.07	7171.02	10475.8	6332.63	7531.04	10437.7	8644.6
29	Ketoglutaric acid	9649.11	7398.54	7621.23	6687.61	6820.71	7684.53	6224.14	7271.25	5880.92	6283.14	6083.25	5144.41	3753.86	4598.13	5086.86	4453.31	5242.45	4632.94	776.843	1748.25	955.598	1573.97	1441.46	1122.36	1413.74	973.103	1318.13	616.878	701.747	459.764	1333.41	1540.37	1234.46	1290.33	1460.38	1619.63	620.383	580.317	630.431	715.428	624.727	644.693	219.722	245.404	216.945	241.271	239.467	227.444
30	L-Glutamic acid	147085	122724	123087	142288	141005	148258	214912	229995	240489	234274	239018	266419	312401	313802	235677	312033	323618	340761	140860	131154	139926	138741	121277	137445	138383	137611	104209	126331	134808	129859	73842.2	82225.8	78548.9	82111.4	70203.7	74051.7	40863.3	40576.5	44572.7	46298.5	42902.8	40601.4	49054.2	53022.2	50264.2	49662.3	41325.3	55923.1
31	L-Phenylalanine	1547.72	1750.58	1597.18	1275.41	1317.77	1630.12	4558.55	5053.26	4438.63	4937.71	4712.36	5026.24	2675.29	2434.89	2496.84	2491.4	2548.43	2615.3	2489.91	1699.84	2474.16	2310.21	1587.5	2382.72	3854.46	3856.81	3436.62	3538.36	3540.18	3482.28	3901.08	4513.88	3613.86	3771.44	3551.78	4172.34	5344.58	5823.65	5697	5854.47	5742.83	5605.42	11136.8	12745.2	12335.7	13118.1	11669.8	13813.9
32	Xylose	680.785	534.614	536.515	577.395	301.887	582.391	411.62	600.448	649.24	654.676	421.008	689.668	511.992	746.812	766.01	663.605	420.865	556.683	52.7212	61.5446	70.3681	62.9846	58.4868	70.586	70.9772	107.343	38.9031	67.2008	55.356	67.338	76.4739	142.982	114.41	142.499	75.1987	114.081	749.024	659.604	855.723	1173.89	1143.06	688.193	1411.99	1067.24	954.145	1352.25	1404.1	901.387
33	L-Arabinose	2294.76	1911.15	1902.39	2119.15	2103.81	2085.58	1888.42	1983.22	2267.96	1766.66	1914.25	1792.85	3134.21	3277.48	2412.68	3575.91	2294.63	3527.66	1599.43	1647.26	1624.23	1650.89	1329.34	1022.82	1461.53	1738.34	1615.72	1413.56	1984.98	1680.21	2421.2	2172.11	2012.27	2188.56	2435.51	2086.65	7510.83	7328.27	7285.06	7419.87	7242.83	7854.12	4084.33	7379.99	7492.34	5309.97	5277.51	4283.21
34	L-Asparagine	5942.69	5448.12	4237.24	4586.04	4336.61	4476.29	6579.49	5757.71	6222.84	5173.15	5206.25	6595.12	43674.8	39484.6	40316.6	41531	44943.8	50528.9	17700.6	11115.4	18968.7	16106.4	14935.6	15041.2	40956.5	38308.5	23167.7	24225.4	22261.8	16222.5	80079.2	84229.9	59775.8	66302.2	55223.7	73553.7	196272	195251	209835	217126	202771	229429	88235.4	97512	89822	104544	80638	99538.6
35	Ribose	10309.6	8705.19	9091.1	8063.14	9557.51	8387.35	5412.29	5888.25	5675.3	6485.38	7082.52	6542.35	10711.2	10649.4	9687.87	6943.62	11496.8	7254.64	9260.66	8249.75	10393.5	7545.38	10010	7075.35	7876.31	12386.4	8775.67	8607.47	12607.4	12281.4	13405.1	9745.5	6527.57	6753.47	7654.91	7890.92	14420.8	15963.5	19700.1	15868.7	17016.8	15679.8	29875.8	29824.4	29986.8	29449	22033.8	22320.6
36	Xylitol	72342.8	85541.7	115571	106486	122786	82133	95322.5	92599.4	105462	119308	97871	112883	114177	123692	129935	119632	128552	112590	123902	127574	110152	126027	123120	133640	83339.2	99282	78950.6	101991	151624	164286	105842	146489	121866	151425	115489	130707	127411	146593	139452	143216	133328	183370	163829	172444	155227	142295	148959	154367
37	Putrescine	1753.81	1729.39	1503.48	1731.14	1638.14	1750.68	1630.39	1589.03	1902.83	1702.04	1569.69	1795.09	2132.47	1797.72	1763.59	1721.69	2122.7	2167.09	2333.47	2585.16	2808.91	2711.97	2358.43	2660.16	2122.85	2355.43	2121.69	2192.86	2314.93	2190.99	3748.04	4088.05	3899.53	3567.91	3501.65	3602.1	55978.9	68694.5	68252	68482	68108.7	56402.3	53444.2	55274.5	68249.5	61442.2	67302.7	54562.1
38	Ribotide	6516.29	6544.88	7785.03	7775.39	8839.34	8333.9	10218.9	9002.83	9943.81	9058.86	9786.72	9004.6	7314.45	8351.3	8306.55	7308.73	8359.72	8320.72	9483.96	9836.75	9157.65	9910.05	9377.74	9254.33	10405.1	10745.5	10527.6	10814.9	10654.9	10490.9	103150	110077	118357	99986.6	101040	123183	7180.12	7368.87	7697.47	7730.63	7521.54	7568.14	5471.95	4935.6	4088.02	5234.21	4259.43	5624.4
39	2-Keto-gluconic acid	2729.62	2118.77	1743.45	2900.86	2568.13	2342.2	4017.37	3899.47	3390.5	3313.61	3787.57	4075.64	4334.64	4802.65	4599.37	4830.51	4318.66	4331.6	11415.5	11186.6	12742.6	12185.1	12777.5	11137.8	9223.57	9215.7	8623.02	8413.78	10798.7	9826.46	17505.2	19451.3	16462.1	16743.9	17065.5	17151.3	2937.9	2809.85	2868.83	2722.83	2949.51	2802.22	4616.14	4458.54	4381.27	4586.11	4444.06	4606.24
40	Shikimic acid	9235.3	8788.2	8723.58	8561.5	8475.93	7831.4	7244.32	7048.36	8138.53	6982.86	7357.23	7746.19	7745.84	6351.84	7890.69	7091.63	7424.76	7131.87	430.576	375.034	434.011	313.485	231.389	470.624	285.719	360.331	261.554	257.372	295.025	249.921	235.575	267.928	258.203	232.118	256.981	246.637	5984.19	5698.21	6041.05	6256.54	5342.7	5690.35	4460.52	5623.52	5117.71	7149.71	6744.98	6966.82
41	Ornithine	-	-	-	-	-	-	-	-	-	-	-	-	-	-	-	-	-	-	167.641	169.779	204.862	154.421	155.599	166.371	734.895	794.233	605.131	644.039	692.641	755.87	430.551	646.495	486.653	517.882	491.895	451.839	-	-	-	-	-	-	-	-	-	-	-	-
42	Citric acid	131943	114057	124681	125587	135425	116393	189413	234821	205732	209828	200644	219075	191371	218785	206455	209787	190849	202843	25022.5	18945.2	26921.2	20678.9	22435.7	23208.6	10622.5	14441.3	10594.7	11334.1	13818.9	13705.8	16991.4	19579.3	15351.2	15777.9	13923.8	16837.3	4450.17	4831.6	4905.31	4531.77	4242.83	4367.31	6774.99	6161.87	6649.43	6802.73	6493.49	6682.15
43	Ascorbic acid	17600	17890.1	17570.9	21673.2	17287.9	20524.3	43437.2	46007.9	45075.8	33045.5	35338.7	36129	16323.2	16895	20008.3	21370.4	18870.1	17494.2	1768.93	1279.78	1807.08	1347.6	1392.18	1208.92	2635.45	1942.39	1882.02	2045.34	1944.9	2559.99	1568.21	1576.68	1386.76	1011.98	1324.65	1126.24	17867	17294.4	23559.2	27868.4	17814.6	18036.4	27377.4	37287.1	33590.9	28224.1	29298.6	31672.5
44	Quinic acid	55744.5	62860.9	62614.2	68709.8	61728	57657.3	37016.4	44614.9	46952.7	44807.2	48811.1	62746.2	37775.5	34278.1	31833.4	35352.3	33647.7	35038.8	3303.42	3237.14	3239.13	2962.02	3244.57	2970.41	3653.8	3814.97	3500.83	3342.49	3634.11	3951.32	2384.24	2149.69	2171.45	2141.99	2382.56	2275.35	54503.1	54628.3	54466.9	53418.8	55354.4	56916	34502.9	36837.5	36547.2	42939.8	38301	42009.3
45	O-Methyl-Inositol	660.646	645.51	651.952	659.533	655.72	684.478	890.476	990.921	1082.31	1365.53	1099.37	1030.51	843.672	1132.33	904.674	987.532	990.333	1048.03	1450.8	1641.15	1353.15	2030.58	2298.7	1346.03	948.785	1051.59	1182.27	831.087	947.798	1805.6	661.164	787.847	853.553	1954.72	1539.13	1685.67	1188.8	1186.39	1248.2	1265.14	1371.22	1188.28	1466.33	966.524	1094.56	1038.48	1105.31	628.836
46	Fructose	81266.1	90519.2	81110.2	87586.6	80191.3	69291.5	136433	138034	149981	142268	164130	160302	131040	114345	114820	111142	138829	99832.1	145589	124041	173566	167168	176396	163307	83381	114647	89954.7	81102.2	128249	94612.1	91956.5	85262.5	89604.1	83704.6	77873.9	80560.4	560456	649474	556034	539565	581694	605983	1.12819e+06	1.35342e+06	1.28794e+06	1.3011e+06	1.27709e+06	1.15326e+06
47	Galactose	85806.5	55977.9	57981.2	88037.3	87066.9	73526.4	176297	168753	176850	178808	180775	176895	96458.8	165804	178587	170654	106758	186777	57146.7	47791.6	65843	64997	66654.3	38937.6	50701.4	64405.3	43764.8	47736.5	62456.7	53731.7	50802.4	47518.9	43577.2	51235.5	39753	41372.3	1.03094e+06	947323	1.02246e+06	1.06665e+06	1.08113e+06	883681	1.40456e+06	1.40551e+06	1.0637e+06	939440	880871	958320
48	L-Lysine	196.631	145.315	194.453	193.78	93.0364	118.711	403.16	547.319	257.942	328.111	494.056	304.743	650.843	757.931	740.256	824.197	640.501	634.667	589.893	435.946	583.359	581.339	279.109	356.134	1209.48	1641.96	773.827	984.332	1482.17	914.228	1952.53	2273.79	2220.77	2472.59	1921.5	1904	1097.4	909.437	818.652	1245.33	609.918	703.671	1481.91	1214.24	1127.16	1427.9	1216.53	1754.52
49	Glucose	19656.1	14603	17012	16776.8	16976	17057.2	34770.5	31587.8	32518.6	34688.6	36895	39027.4	31052.6	33641	33784.8	33654.5	34846.4	35023.9	11228.9	10777.6	13520.7	10683.8	9843.16	13050.2	6910.18	10387.1	8290.22	8373.24	9585.84	7552.67	7484.7	6929.22	6961.93	7185.33	6579.03	6435.11	406013	406045	451604	411832	408506	445534	477028	426599	414826	441387	367507	368206
50	Tyrosine	350.484	243.571	226.796	242.869	284.734	258.376	651.995	472.946	435.305	412.199	499.427	490.443	580.067	442.965	511.171	426.245	372.367	508.897	897.098	487.963	650.752	576.137	602.694	711.758	1634.4	1423.68	1046.14	1370.79	1427.67	1300.68	1846.72	1747.64	1561.79	1382.87	1382.48	1250.32	1114.94	1391.21	1424.59	1455.43	1224.94	1294.5	1680.54	1869.03	1698.46	2203.55	1906.13	989.795
51	Mannitol	-	-	-	-	-	-	-	-	-	-	-	-	-	-	-	-	-	-	764.899	785.364	781.595	777.064	875.027	694.253	121.573	294.334	269.129	326.845	175.017	426.598	372.042	362.676	143.045	328.872	338.2	293.511	-	-	-	-	-	-	-	-	-	-	-	-
52	Hexadecanoic acid	19365.1	16497.5	22268.8	21989.9	24401.2	16626.7	17566.5	18163	16189.7	18109	18002.1	19840	27532.2	30933.5	33105.6	29700.4	28997.9	30430.2	16168.4	24420	18718.6	48899.1	26088.1	21349.1	15068.2	18079.5	17947	21406.8	23643.4	24025.8	26630.4	35950.5	25575.4	36557.9	27243.2	32012	35995.4	49335.1	44077.9	45958.8	46646.7	54668.9	40268	52642.5	52901.1	47954.3	47341.2	39110.6
53	Inositol	25971.7	24815.1	25120.6	26364	25687.4	23479.6	23361.6	24463.8	25383.1	24337.2	25617.9	27934.8	25779.4	28881.4	28971.3	26062.6	28816.5	30250	6839.04	6853.14	6961.03	6345.76	6285.91	6178.86	8022.62	9424.39	7296.44	7625.14	10121.6	9673.24	7134.87	8349.43	6447.06	6606.14	6739.82	6997.79	43821.9	41775	43505.5	41669.9	42316.4	42493.7	30562.8	32609.2	29509.1	33641.7	30510.1	28775.6
54	Sorbose	57125.1	55352.2	55967.3	57656.3	54549.1	47831.5	89707.1	94999.4	76157.9	79396.7	100682	108169	72889.4	62590.4	78884.6	75849.6	80119.7	62919.6	81003.6	82354.5	95906.6	93300.9	97091.2	91789.9	68948.4	71921.7	50057.6	55454.2	68679.6	59764.9	50838.9	50697.6	46650.7	47319.3	40044	40264.2	325793	356713	340757	342362	372144	316404	454214	653232	636246	683157	602207	364260
55	Maltose	169.221	130.093	150.276	137.78	112.959	145.895	125.089	114.88	139.455	126.429	157.013	120.648	169.208	179.496	185.411	158.865	184.434	178.553	254.765	161.659	243.98	243.399	184.348	199.972	192.713	179.388	149.104	188.167	181.449	136.853	304.223	293.748	301.187	191.876	209.418	222.785	93.8184	93.6767	105.579	121.457	86.4291	98.1537	83.6229	94.8957	99.4103	77.791	86.4291	105.621
56	Sucrose	539617	564896	608898	663541	636107	555107	599344	594107	599698	622462	620923	687796	724476	749920	771662	768553	731814	761918	123537	134767	132541	129445	127918	124447	108458	101220	94646.8	95653.4	106023	99419.1	92549.3	87907.3	70600	87880.1	70135.4	71305.6	666857	612594	589961	592129	610018	643346	669495	671653	698130	699534	689987	632792
57	Trehalose	-	-	-	-	-	-	-	-	-	-	-	-	-	-	-	-	-	-	370.355	351.988	392.983	345.013	288.929	390.898	204.855	266.674	251.761	249.294	252.897	317.325	396.153	342.045	383.306	353.688	397.728	390.123	-	-	-	-	-	-	-	-	-	-	-	-
Note: C,control; LK,low potassium
[truncated: 24 more columns]
